# Supplementary material for: Evolution of kidney function after five years of follow-up in a large Spanish cohort of patients with HIV: Risk factors for progression
Source: Research Square preprint supplement (doi:10.21203/rs.3.rs-7373190/v1), 2025-09-26
Supplement: Supplementary file 1 [file 7df4553772eaa032a7a63c5b.docx]

| **Table 4:** Risk factors of renal damage in global cohort.  [Escriba una cita del documento o del resumen de un punto interesante. Puede situar el cuadro de texto en cualquier lugar del documento. Utilice la ficha Herramientas de cuadro de texto para cambiar el formato del cuadro de texto de la cita.]  **Variable** | **Missing values** | **Global cohort** | **Non progressors** | **Progressors** | **HR (95%CI) unadjusted (Univariate)** | **p value** | **HR (95%CI) adjusted**¶ **(Multivariate)** | **p value** |
| --- | --- | --- | --- | --- | --- | --- | --- | --- |
| Number of patients | - | 3324 | 2068 (62%) | 1256 (38%) | - | - | - | - |
| Median age, years (IQR) † | 0 | 45 (14) | 44 (15) | 47 (13) | **1.028 (1.021-1.035)** | **<0.001** | **1.028 (1.017-1.039)** | **<0.001** |
| Female sex, n (%) | 0 | 651 (20%) | 382 (19%) | 269 (21%) | **1.203 (1.010-1.432)** | **0.038** | 1.123 (0.803-1.570) | 0.498 |
| Black race, n (%) | 1233 (37%) | 40 (1%) | 18 (1%) | 22 (2%) | **2.161 (1.151-4.055)** | **0.016** | **2.225 (1.151-4.302)** | **0.017** |
| Body mass index, kg/m2 (IQR) | 2363 (71%) | 23 (3) | 23 (3) | 23 (3) | 1.007 (0.964-1.052) | 0.761 |  |  |
| Current or previous smoker, n (%) | 268 (8%) | 1902 (57%) | 1202 (58%) | 700 (56%) | 0.904 (0.778-1.051) | 0.191 |  |  |
| Hypertension, n (%) | 0 | 466 (140%) | 256 (12%) | 210 (17%) | **1.421 (1.166-1.732)** | **<0.001** | 0.885 (0.625-1.254) | 0.492 |
| Diabetes mellitus, n (%) | 0 | 155 (5%) | 89 (4%) | 66 (5%) | 1.233 (0.890-1.709) | 0.208 |  |  |
| Dislipemia, n (%) | 0 | 448 (14%) | 259 (13%) | 189 (15%) | **1.237 (1.011-1.514)** | **0.039** | 0.788 (0.553-1.124) | 0.189 |
| Cardiovascular disease, n (%) | 0 | 137 (4%) | 74 (4%) | 63 (5%) | **1.423 (1.009-2.006)** | **0.044** | **1.880 (1.045-3.382)** | **0.035** |
| Hepatitis B coinfection, n (%) | 15 (0.5%) | 109 (3%) | 65 (3%) | 44 (43%) | 1.116 (0.756-1.647) | 0.580 |  |  |
| Hepatitis C coinfection, n (%) | 7 (0.2%) | 707 (21%) | 458 (22%) | 249 (20%) | 0.870 (0.731-1.034) | 0.114 |  |  |
| Mode of HIV acquistion, n (%) | 175 (5%) |  |  |  |  |  |  |  |
| Homosexual/bisexual |  | 1958 (59%) | 1241 (60%) | 717 (57%) | 0.859 (0.741-0.996) | 0.044 | 1.193 (0.855-1.665) | 0.298 |
| Heterosexual |  | 889 (27%) | 517 (25%) | 372 (30%) | **1.254 (1.070-1.469)** | **0.005** | 1.126 (0.830-1.527) | 0.445 |
| Injection drug use |  | 445 (13%) | 274 (13%) | 171 (14%) | 1.022 (0.832-1.256) | 0.834 |  |  |
| Duration of HIV infecion, years (IQR) | 15 (0.5%) | 11 (14) | 11 (14) | 13 (13) | **1.015 (1.006-1.024)** | **0.001** | 1.002 (0.987-1.017) | 0.806 |
| Prior AIDS (yes), n (%) | 0 | 666 (20%) | 399 (19%) | 267 (21%) | 1.129 (0.949-1.344) | 0.170 |  |  |
| Current ART regimen | 0 |  |  |  |  |  |  |  |
| No treatment, n (%) |  | 78 (2%) | 55 (3%) | 23 (2%) | reference group | - |  |  |
| NNRTI-based, n (%)‡ |  | 1800 (54%) | 1105 (53%) | 695 (55%) | 1.504 (0.916-2.469) | 0.107 |  |  |
| PI-based, n (%) § |  | 105 (3%) | 65 (3%) | 40 (3%) | 1.472 (0.787-2.752) | 0.227 |  |  |
| Boosted PI-based, n (%) |  | 964 (29%) | 594 (29%) | 370 (30%) | 1.490 (0.900-2.465) | 0.121 |  |  |
| Integrase inhibitors-based, n(%) |  | 358 (11%) | 234 (11%) | 124 (109%) | 1.267 (0.744-2.160) | 0.384 |  |  |
| Others, n (%) |  | 19 (0.6%) | 15 (1%) | 4 (0.3%) | 0.638 (0.191-2.129) | 0.464 |  |  |
| TENOFOVIR | 0 | 2794 (84%) | 1730 (84%) | 1064 (85%) | 1.083 (0.893-1.313) | 0.419 |  |  |
| Time on TENOFOVIR | 0 | 1.25 (4.2) | 1.10 (4.1) | 1.50 (4.5) | 1.015 (0.995-1.035) | 0.136 |  |  |
| Nadir CD4 cell count (IQR) | 13 (0.4%) | 248 (233) | 252 (231) | 239 (237) | 1.000 (0.999-1.000) | 0.114 |  |  |
| Current CD4 cell count | 2 (0.1%) | 638 (372) | 637 (375) | 639 (370) | 1.000 (1.000-1.000) | 0.781 |  |  |
| Current HIV infection status  †IQR: Interquartile range; ‡ NNRTI: non-nucleoside reverse transcriptase inhibitor; § PI: protease inhibitor; a: patients can present more than one HIV transmission route; ¶ Adjusted for significant variables in univariate analysis | 0 |  |  |  |  |  |  |  |
| Supression, n (%) |  | 3047 (92%) | 1887 (91%) | 1160 (92%) | 1.159 (0.895-1.500) | 0.262 |  |  |
