# Supplementary material for: Evolution of kidney function after five years of follow-up in a large Spanish cohort of patients with HIV: Risk factors for progression
Source: Research Square preprint supplement (doi:10.21203/rs.3.rs-7373190/v1), 2025-09-26
Supplement: Supplementary file 2 [file feaa728f9d4a587d0af0fb25.docx]

| **Variable** | **Missing values** | **Global cohort (stage 1 in 2014)** | **Non progressors** | **Progressors (to Stage 2,3,4,5)** | **HR (95%CI) unadjusted (Univariate)** | **p value** | **HR (95%CI) adjusted**¶  **(Multivariate)** | **p value** |
| --- | --- | --- | --- | --- | --- | --- | --- | --- |
| Number of patients | - | 2405 | 1335 | 1070 | - | - | - | - |
| Median age, years (IQR) † | 0 | 43 (14) | 41 (14) | 46 (13) | **1.055 (1.046-1.065)** | **<0.001** | **1.064 (1.052-1.077)** | **<0.001** |
| Female sex, n (%) | 0 | 467 (19%) | 243 (18%) | 224 (21%) | 1.190 (0.972-1.457) | 0.093 |  |  |
| Black race, n (%) | 822 (34%) | 30 (1%) | 12 (1%) | 18 (3%) | 2.078 (0.994-4.345) | 0.052 |  |  |
| Body mass index, kg/m2 (IQR) | 1641 (68%) | 23 (3) | 23 (3) | 23 (3) | 1.005 (0.959-1.053) | 0.831 |  |  |
| Current or previous smoker, n (%) | 176 (7%) | 1423 (59%) | 815 (65%) | 608 (62%) | 0.862 (0.724-1.025) | 0.093 |  |  |
| Hypertension, n (%) | 0 | 234 (10%) | 108 (8%) | 126 (12%) | **1.516 (1.157-1.988)** | **0.003** | 0.987 (0.718-1.357) | 0.938 |
| Diabetes mellitus, n (%) | 0 | 86 (4%) | 37 (3%) | 49 (5%) | **1.684 (1.090-2.600)** | **0.019** | 1.162 (0.710-1.903) | 0.549 |
| Dislipemia, n (%) | 0 | 222 (9%) | 100 (8%) | 122 (11%) | **1.589 (1.204-2.098)** | **0.001** | 0.999 (0.721-1.384) | 0.995 |
| Cardiovascular disease, n (%) | 0 | 71 (3%) | 37 (3%) | 34 (3%) | 1.151 (0.718-1.847) | 0.559 |  |  |
| Hepatitis B coinfection, n (%) | 8 (0.3%) | 75 (3%) | 39 (3%) | 36 (3%) | 1.154 (0.728-1.828) | 0.542 |  |  |
| Hepatitis C coinfection, n (%) | 5 (0.2%) | 505 (21%) | 296 (22%) | 209 (20%)  **Table 5:** Risk factors of renal damage in patients classified as Stage 1. | 0.852 (0.698-1.039) | 0.113 |  |  |
| Mode of HIV acquisition, n (%) | 131 (5%) |  |  |  |  |  |  |  |
| Homosexual/bisexual |  | 1445 (60%) | 824 (66%) | 621 (61%) | 0.820 (0.691-0.974) | 0.023 | 1.150 (0.876-1.510) | 0.315 |
| Heterosexual |  | 622 (26%) | 309 (25%) | 313 (31%) | **1.361 (1.131-1.637)** | **0.001** | 1.260 (0.972-1.634) | 0.081 |
| Injection drug use |  | 313 (13%) | 168 (13%) | 145 (14%) | 1.076 (0.847-1.367) | 0.550 |  |  |
| Duration of HIV infection, years (IQR) | 12 (0.5%) | 10 (14) | 9 (14) | 12 (14) | **1.020 (1.010-1.030)** | **<0.001** | **0.984 (0.970-0.998)** | **0.030** |
| Prior AIDS (yes), n (%) | 0 | 435 (18%) | 227 (17%) | 208 (19%) | 1.178 (0.956-1.450) | 0.123 |  |  |
| Current ART regimen | 0 |  |  |  |  |  |  |  |
| No treatment, n (%) |  | 64 (3%) | 41 (3%) | 23 (2%) | reference group | - |  |  |
| NNRTI-based, n (%) ‡ |  | 1324 (55%) | 720 (54%) | 604 (56%) | 1.495 (0.887-2.520) | 0.131 |  |  |
| PI-based, n (%) § |  | 76 (3%) | 45 (3%) | 31 (3%) | 1.228 (0.619-2.437) | 0.557 |  |  |
| Boosted PI-based, n (%) |  | 705 (29%) | 389 (29%) | 316 (30%) | 1.448 (0.851-2.464) | 0.172 |  |  |
| Integrase inhibitors- based, n (%) |  | 223 (9%) | 130 (10%) | 93 (9%) | 1.275 (0.717-2.268) | 0.408 |  |  |
| Others, n (%) |  | 13 (0.5%) | 10 (1%) | 3 (0.3%) | 0.535 (0.134-2.142) | 0.377 |  |  |
| **Variable** | **Missing values** | **Global cohort (stage 1 in 2014)** | **Non progressors** | **Progressors (to Stage 2,3,4,5)** | **HR (95%CI) unadjusted (Univariate)** | **p value** | **HR (95%CI) adjusted**¶  **(Multivariate)** | **p value** |
| TENOFOVIR | 0 | 1998 (83%) | 1093 (82%) | 905 (85%) | 1.214 (0.978-1.508) | 0.079 |  |  |
| Time on TENOFOVIR | 0 | 0.90 (3.7) | 0.6 (3.4) | 1.2 (4.0) | **1.047 (1.020-1.075)** | **0.001** | 1.016 (0.987-1.047) | 0.280 |
| Nadir CD4 cell count (IQR) | 7 (0.3%) | 259 (229) | 269 (238) | 249 (224) | 0.999 (0.999-1.000) | 0.003 | 1.000 (1.000-1.001) | 0.653 |
| Current CD4 cell count | 1 (0%) | 646 (369) | 644 (374) | 649 (369) | 1.000 (1.000-1.000) | 0.838 |  |  |
| Current HIV infection status | 0 |  |  |  |  |  |  |  |
| Supression, n (%) |  | 2178 (91%) | 1198 (90%) | 980 (92%) | 1.246 (0.942-1.646) | 0.123 |  |  |

†IQR: Interquartile range; ‡ NNRTI: non-nucleoside reverse transcriptase inhibitor; § PI: protease inhibitor; a: patients can present more than one HIV transmission route; ¶ Adjusted for significant variables in univariate analysis
